# Supplementary material for: Comparative Analysis of Chemical Composition of Zanthoxylum myriacanthum Branches and Leaves by GC-MS and UPLC-Q-Orbitrap HRMS, and Evaluation of Their Antioxidant Activities
Source: MDPI journal article supplement (doi:10.3390/molecules28155631), 2023-07-25
Supplement: s1 [file s1]

# Comparative Analysis of Chemical Composition of *Zanthoxylum myriacanthum* Branches and Leaves by GC-MS and UPLC-Q-Orbitrap HRMS, and Evaluation of their Antioxidant Activities

Wei Dai <sup>1,\*</sup>, Liangqian Zhang <sup>2</sup>, Liping Dai <sup>3</sup>, Yuan Tian <sup>2</sup>, Xinger Ye <sup>3</sup>, Sina Wang <sup>1</sup>, Jingtao Li <sup>1</sup> and Qi Wang <sup>2,\*</sup>

<sup>1</sup> Experimental Center of Yunfu Campus, Guangdong Pharmaceutical University, Yunfu 527325, China; wangsn@gdpu.edu.cn (S.W.); kingtal@gdpu.edu.cn (J.L.)

<sup>2</sup> Shihezi University College of Pharmacy/Key Laboratory of Xinjiang Phytomedicine Resource and Utilization, Ministry of Education, Shihezi, 832003, China; 17799930579@163.com (L.Z.); 15700973063@163.com (Y.T.)

<sup>3</sup> College of Traditional Chinese Medicine Resources, Guangdong Pharmaceutical University, Yunfu 527325, China; 16680128026@163.com (L.D.); xeye@gdpu.edu.cn (X.Y.)

\* Correspondence: dai\_gdpu\_2018@gdpu.edu.cn (W.D.); qiw16@163.com (Q.W.)

**Figure S1.** GC-MS chromatograms of branches of *Zanthoxylum myriacanthum*

**Figure S2.** GC-MS chromatograms of leaves of *Zanthoxylum myriacanthum*

**Figure S3.** UPLC-Q-Orbitrap HRMS chromatograms of branches *Zanthoxylum myriacanthum* in negative ion mode

**Figure S4.** UPLC-Q-Orbitrap HRMS chromatograms of branches *Zanthoxylum myriacanthum* in positive ion mode

**Figure S5.** UPLC-Q-Orbitrap HRMS chromatograms of leaves *Zanthoxylum myriacanthum* in negative ion mode

**Figure S6.** UPLC-Q-Orbitrap HRMS chromatograms of leaves *Zanthoxylum myriacanthum* in positive ion mode

**Figure S7.** *Zanthoxylum myriacanthum* leaves and branches identified identical volatile structures

**Figure S8.** *Zanthoxylum myriacanthum* leaves and branches identified identical non-volatile structures

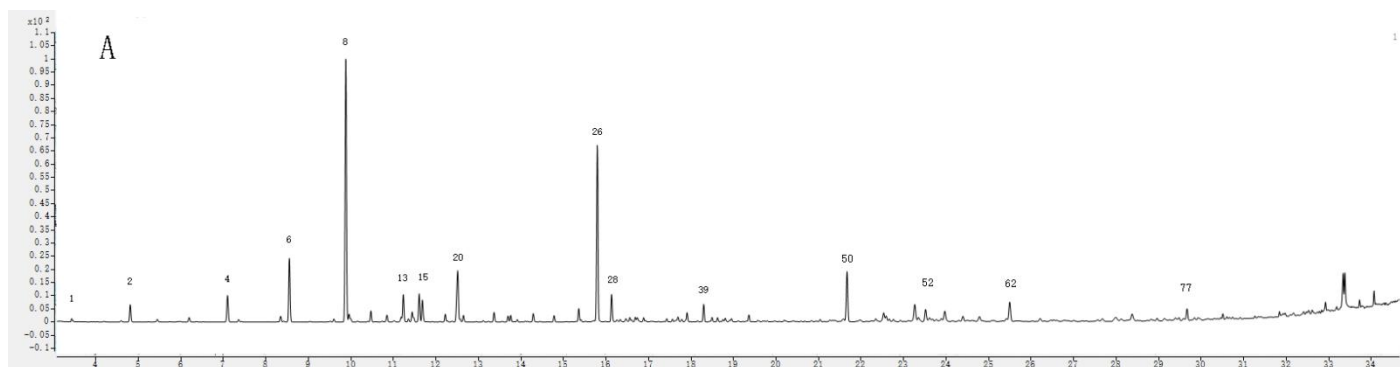

**Figure S1.** GC-MS chromatograms of branches of *Zanthoxylum myriacanthum*

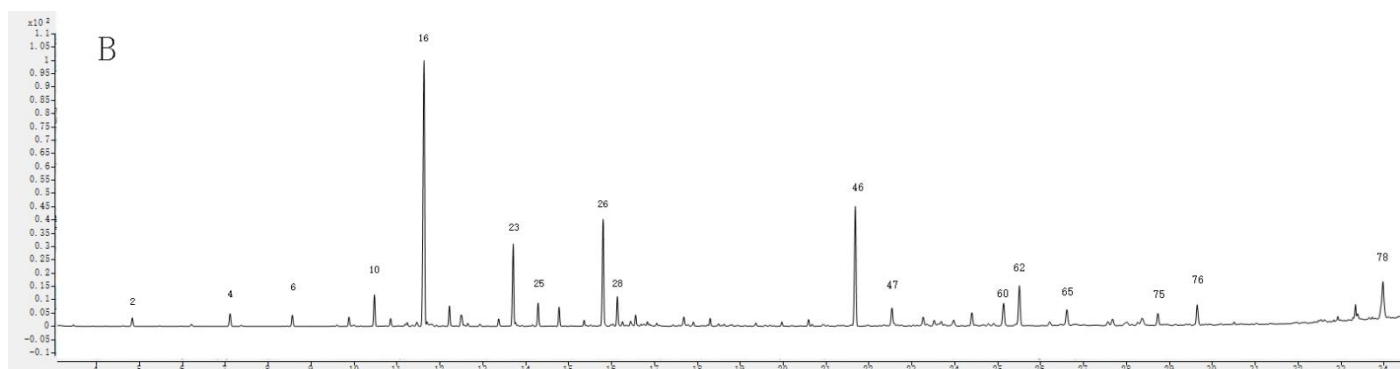

**Figure S2.** GC-MS chromatograms of leaves of *Zanthoxylum myriacanthum*

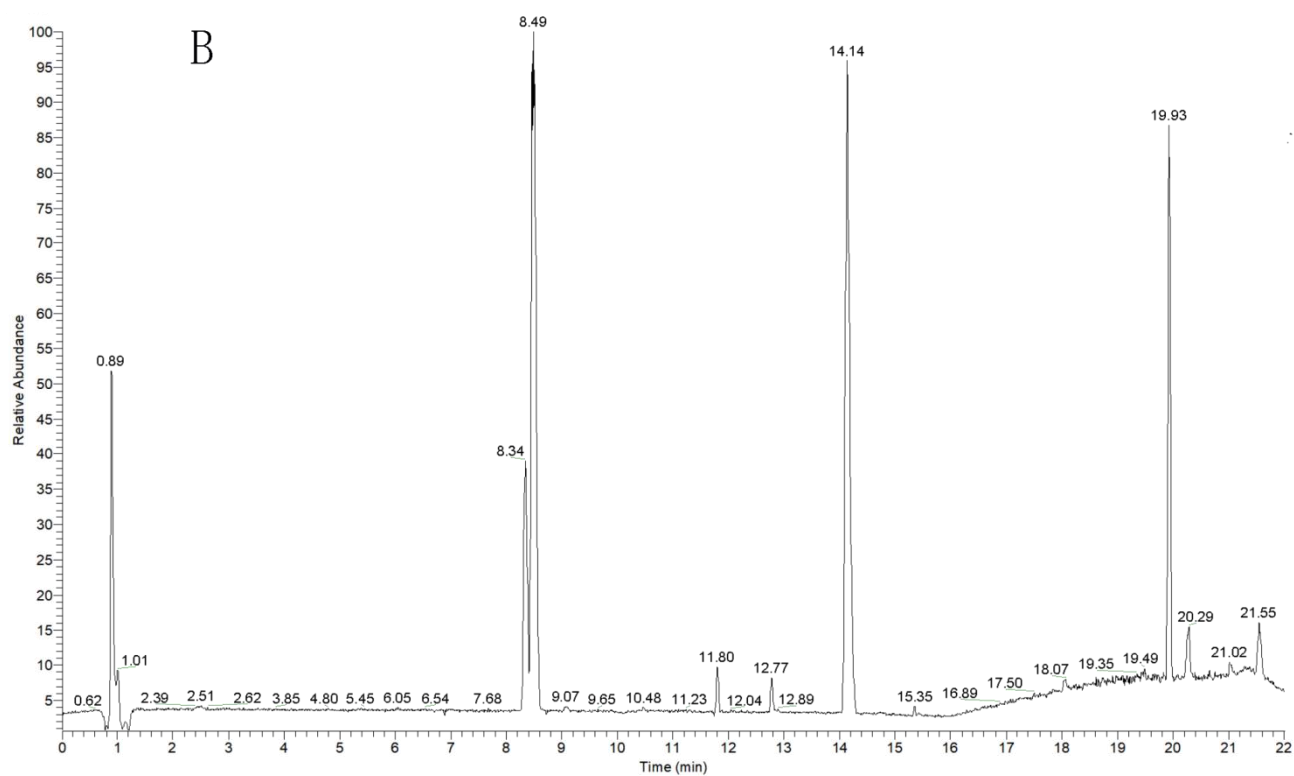

**Figure S3.** UPLC-Q-Orbitrap HRMS chromatograms of branches *Zanthoxylum myriacanthum* in negative ion mode

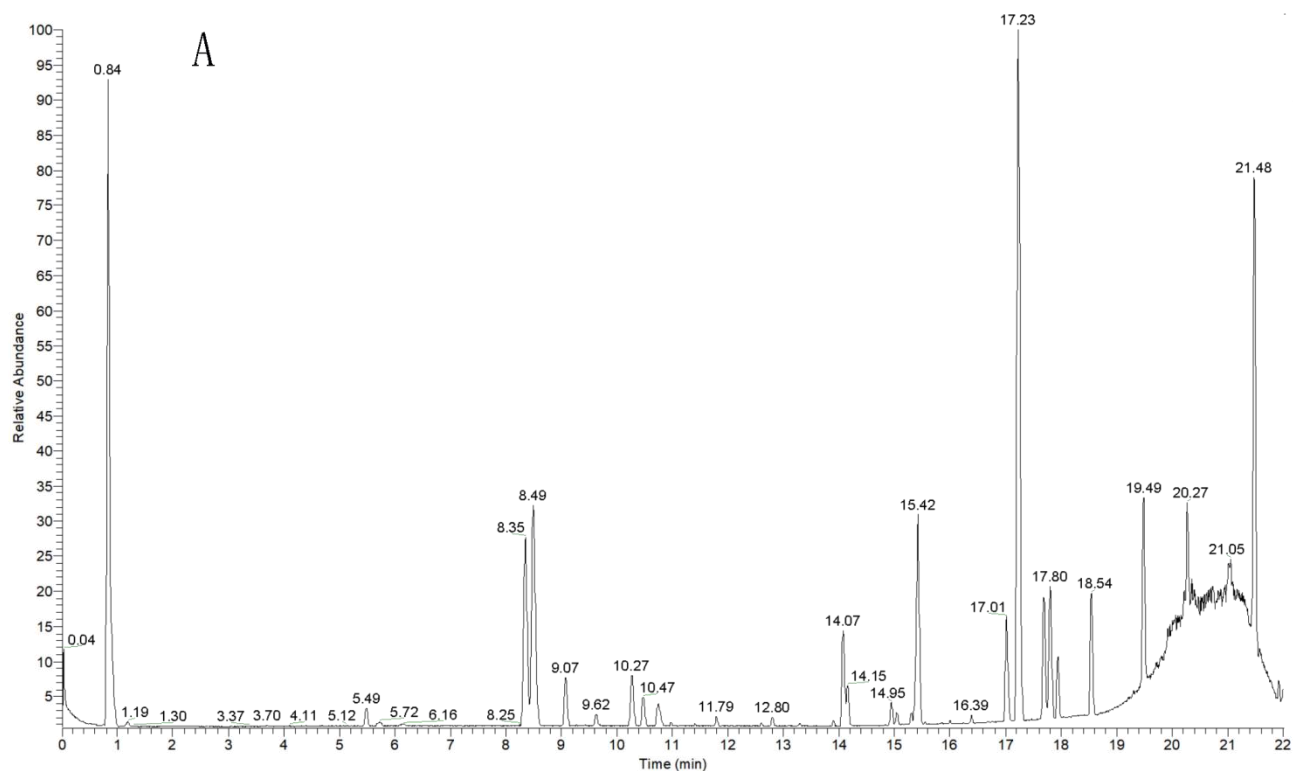

**Figure S4.** UPLC-Q-Orbitrap HRMS chromatograms of branches *Zanthoxylum myriacanthum* in positive ion mode

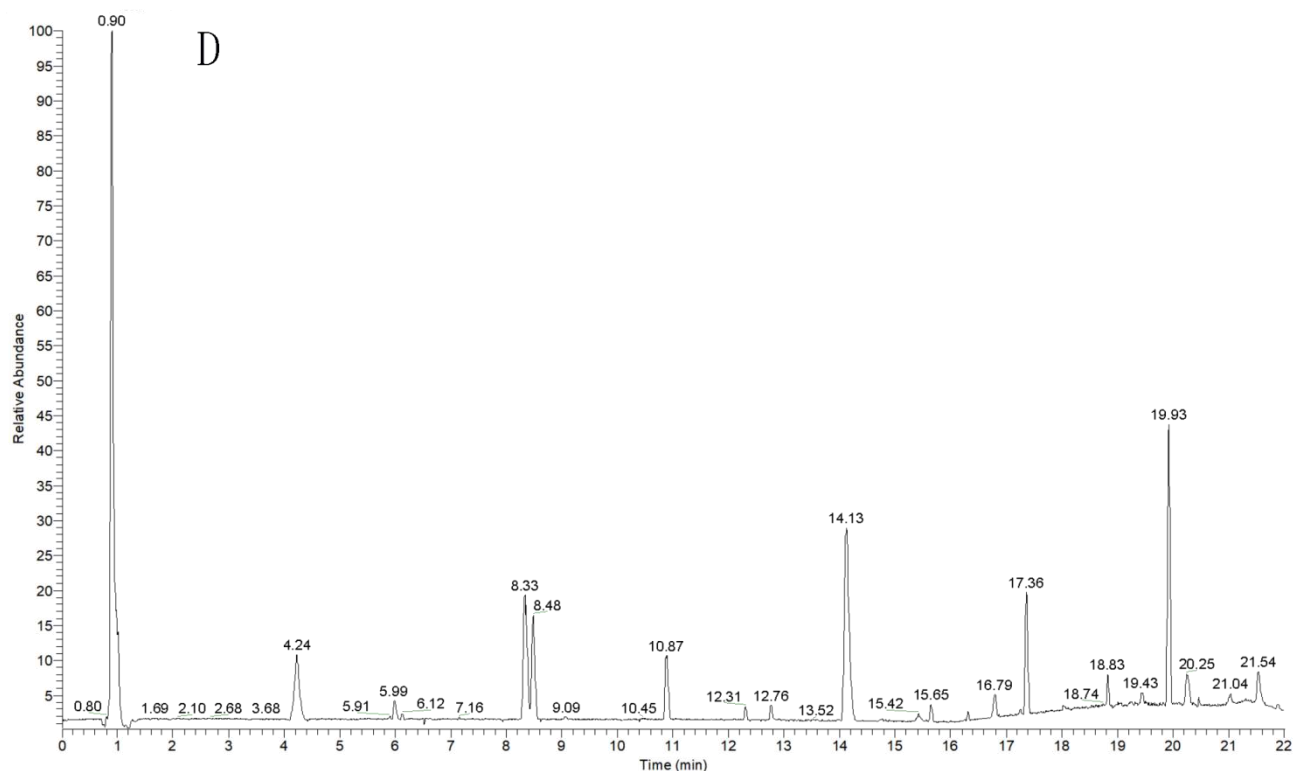

**Figure S5.** UPLC-Q-Orbitrap HRMS chromatograms of leaves *Zanthoxylum myriacanthum* in negative ion mode

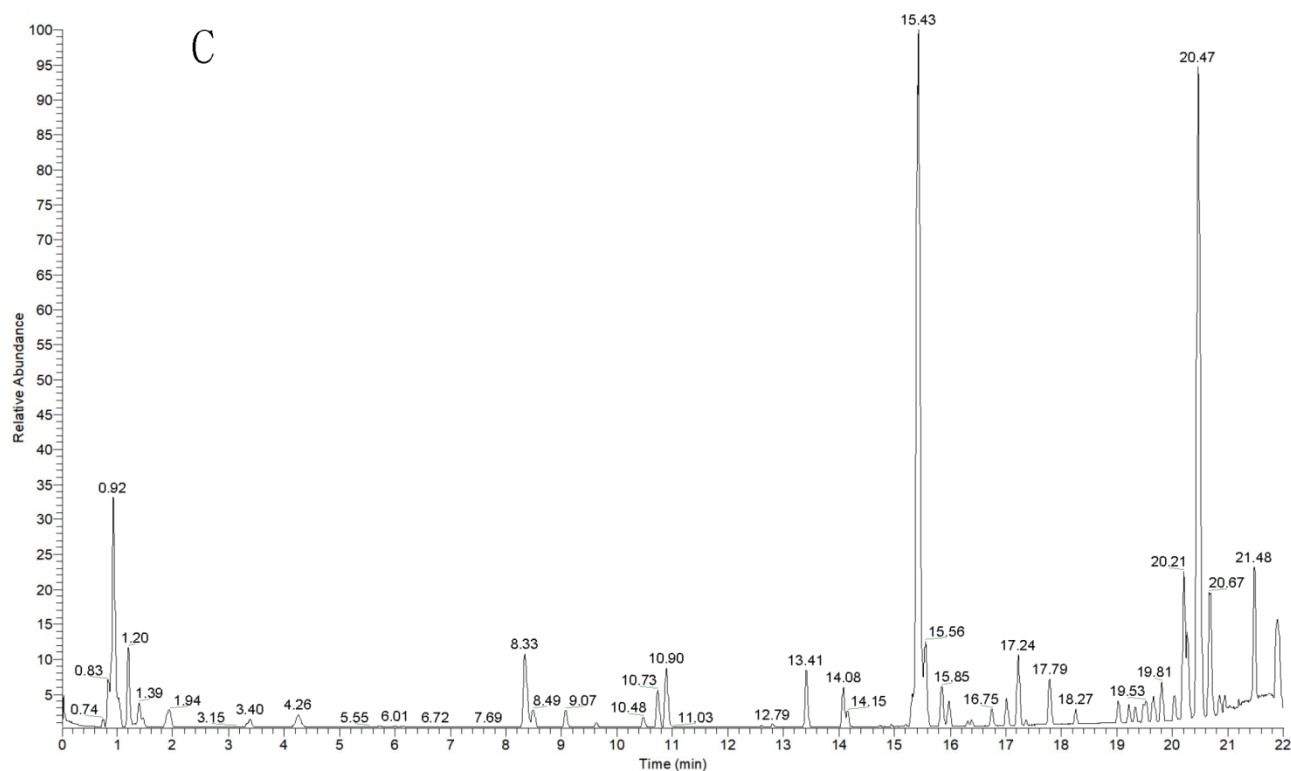

**Figure S6.** UPLC-Q-Orbitrap HRMS chromatograms of leaves *Zanthoxylum myriacanthum* in positive ion mode

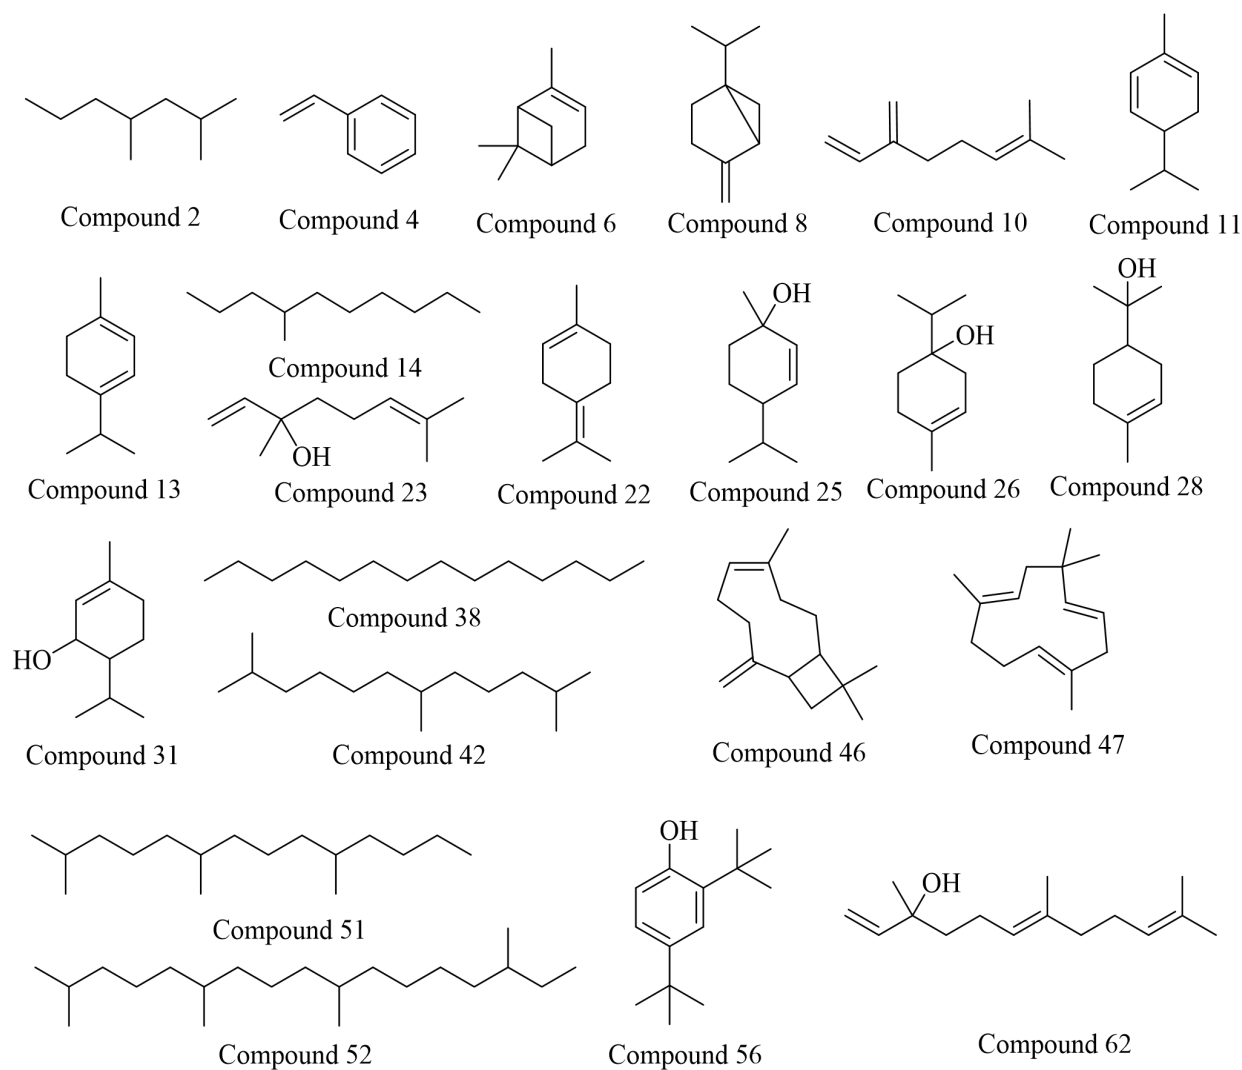

**Figure S7.** *Zanthoxylum myriacanthum* leaves and branches identified identical volatile structures

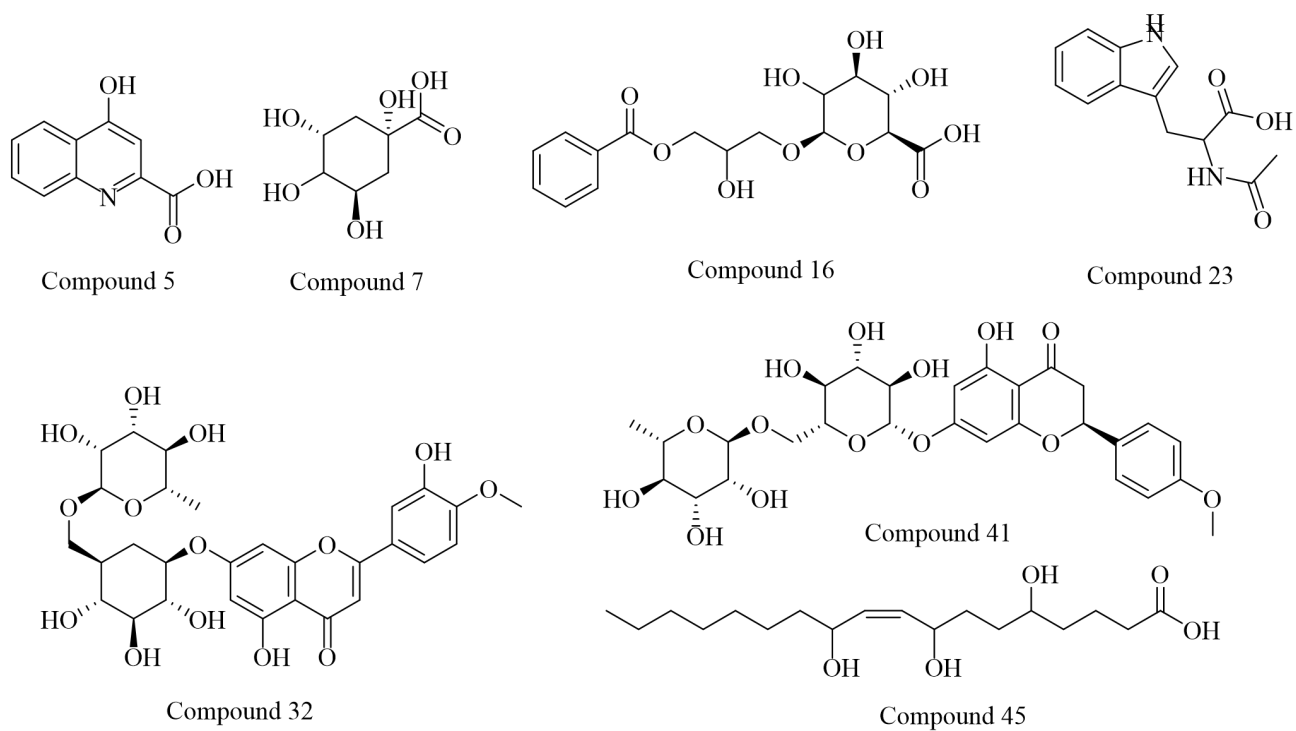

**Figure S8.** *Zanthoxylum myriacanthum* leaves and branches identified identical non-volatile structures
